# Supplementary material for: Trihelix transcription factor GT-4 mediates salt tolerance via interaction with TEM2 in Arabidopsis
Source: PubMed Central journal article supplement (PMC4267404; doi:10.1186/s12870-014-0339-7), 2014-12-03
Supplement: 12870_2014_339_MOESM2_ESM.pdf [file 12870_2014_339_MOESM2_ESM.pdf]

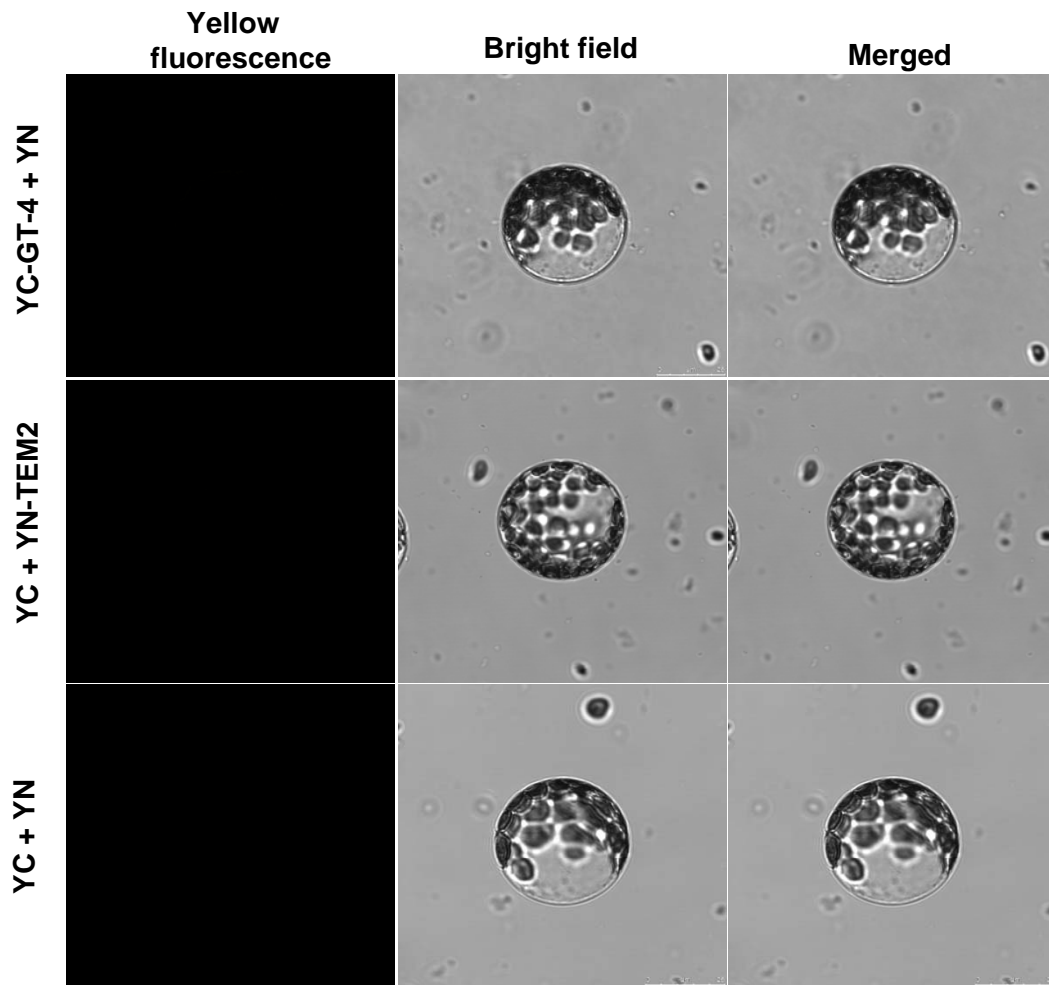

**Additional file 2.** Negative control of Bimolecular fluorescence complementation (BiFC) assay
