# Supplementary material for: Trihelix transcription factor GT-4 mediates salt tolerance via interaction with TEM2 in Arabidopsis
Source: PubMed Central journal article supplement (PMC4267404; doi:10.1186/s12870-014-0339-7), 2014-12-03
Supplement: 12870_2014_339_MOESM3_ESM.pdf [file 12870_2014_339_MOESM3_ESM.pdf]

**Additional file 3.** Primers used for Q-PCR

| <b>Gene</b>   | <b>Primer name</b> | <b>Primer sequence</b>      |
|---------------|--------------------|-----------------------------|
| <i>GT-4</i>   | qGT-4 F            | ACAACATCCTTCACGGGACATA      |
|               | qGT-4 R            | CTCTGCTCGTTTCTTTGGTGCTT3    |
| <i>Cor15A</i> | qCor15A F          | ATGGCGATGTCTTTCTCAGGAGCTGTT |
|               | qCor15A R          | TTTTATCCGTCACGAAATCTGAAGCTT |
| <i>TEM2</i>   | qTEM2 F            | GTTCTGGAAGACGGCGATTAG       |
|               | qTEM2 R            | TTTCTCGGCGTGTTGTTTAGGT      |
| <i>Actin2</i> | qActin2 F          | ATGCCCAGAAAGTCTTGTTC        |
|               | qActin2 R          | TGCTCATACGGTCAGCGATA        |
